# Supplementary material
Source: PubMed Central journal article supplement (PMC3290523)
Supplement: NIHMS357875-supplement-final_SI.pdf [file NIHMS357875-supplement-final_SI.pdf]

Cell, volume 126

## Supplemental Data

### Resource

#### A Rapid, Reversible, and Tunable Method to Regulate Protein Function in Living Cells Using Synthetic Small Molecules

Laura A. Banaszynski, Ling-chun Chen, Lystranne A. Maynard-Smith, A. G. Lisa Ooi, and Thomas J. Wandless

### Supplemental Figures

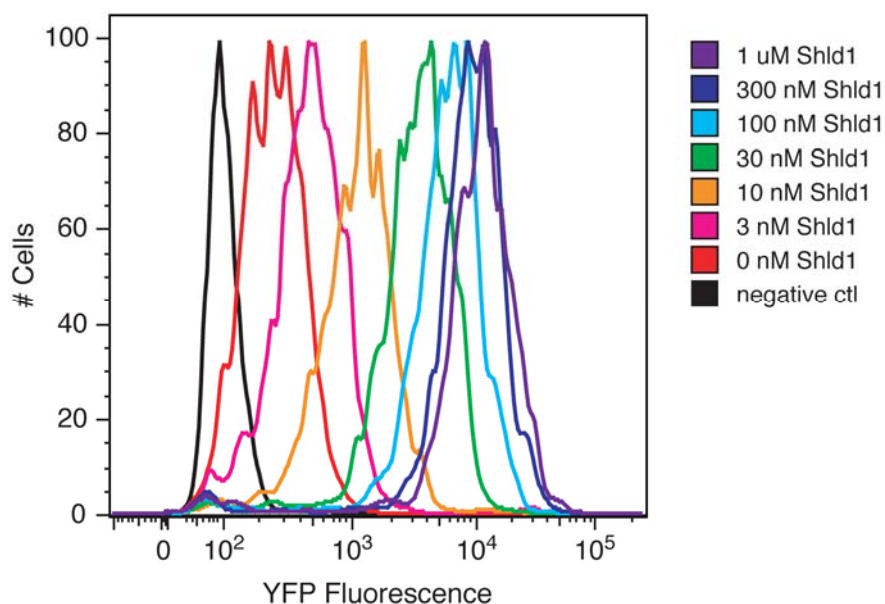

**Figure S1.** Response of the L106P-YFP fusion to varying concentrations of Shld1.

NIH3T3 cells stably expressing the L106P-YFP fusion were titrated with three-fold dilutions of Shld1 (1  $\mu$ M to 3 nM) and monitored by flow cytometry. Data shown are a representative example of an experiment performed in triplicate.

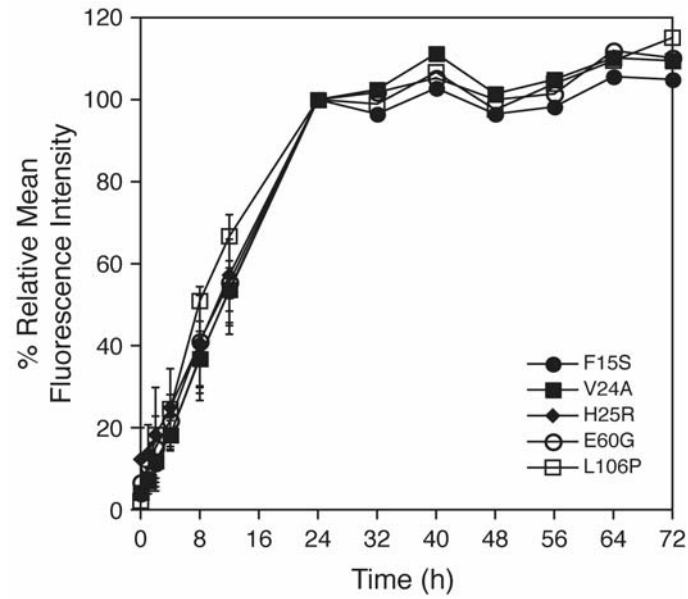

**Figure S2.** Kinetics of FKBP-YFP fluorescence growth upon addition of Shld1.

NIH3T3 cells stably expressing the indicated FKBP-YFP fusions were treated with 1  $\mu$ M Shld1, and increases in fluorescence were monitored over time using flow cytometry. Data are presented as the average mean fluorescence intensity (MFI)  $\pm$  SEM relative to that of the maximum fluorescence intensity observed for the individual mutant. The experiment was performed in triplicate, and MFI was normalized to 100% at 24 hr.

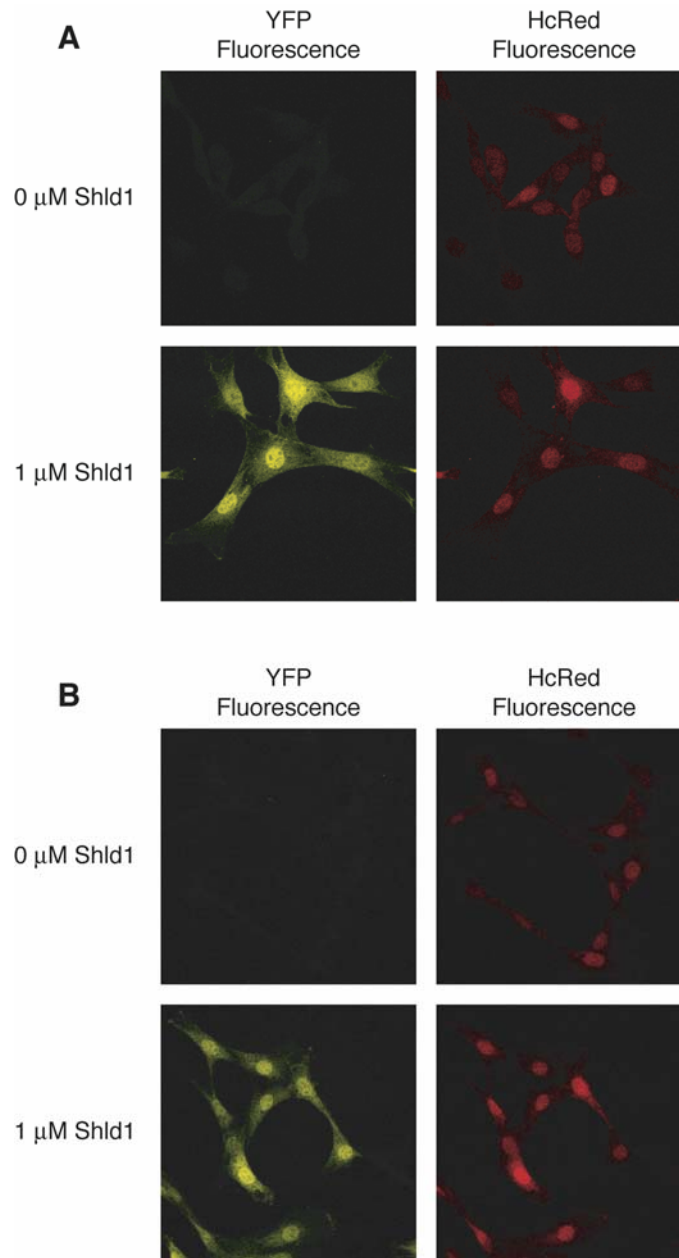

**Figure S3.** Fusion of an FKBP destabilizing domain to YFP results in Shld1-dependent fluorescence. **(A)** NIH3T3 cells stably expressing an FKBP F15S-YFP fusion were either mock-treated or treated with 1  $\mu$ M Shld1 for 24 hrs. Cells were then fixed and visualized using fluorescence microscopy. HcRed fluorescence serves as a marker of infection. **(B)** NIH3T3 cells stably expressing an FKBP L106P-YFP fusion were treated as above.

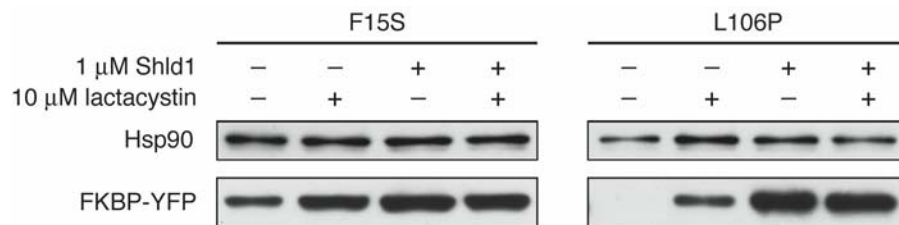

**Figure S4.** Degradation of FKBP-YFP fusions is mediated by the proteasome. NIH3T3 cells stably expressing F15S-YFP and L106P-YFP were treated with 1  $\mu$ M Shld1 for 24 hrs. Cells were then washed and treated with 10  $\mu$ M lactacystin in the presence and absence of 1  $\mu$ M Shld1 for 4 hrs. Immunoblotting was performed with an anti-YFP antibody.

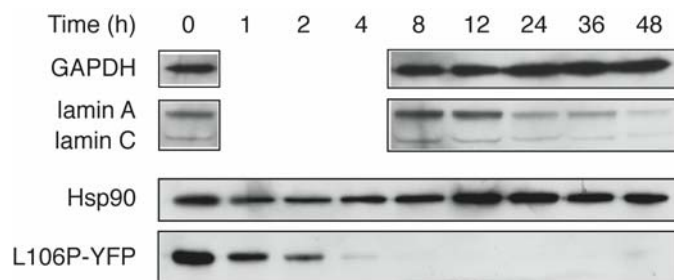

**Figure S5.** DD-mediated degradation shows faster kinetics than RNAi-mediated silencing. HeLa cells were transfected with 30 nM siRNA against lamin A/C and monitored over time. Time required for knockdown of lamin A/C is compared against time required for degradation of L106P-YFP upon removal of Shld1 from NIH3T3 cells stably expressing the fusion.

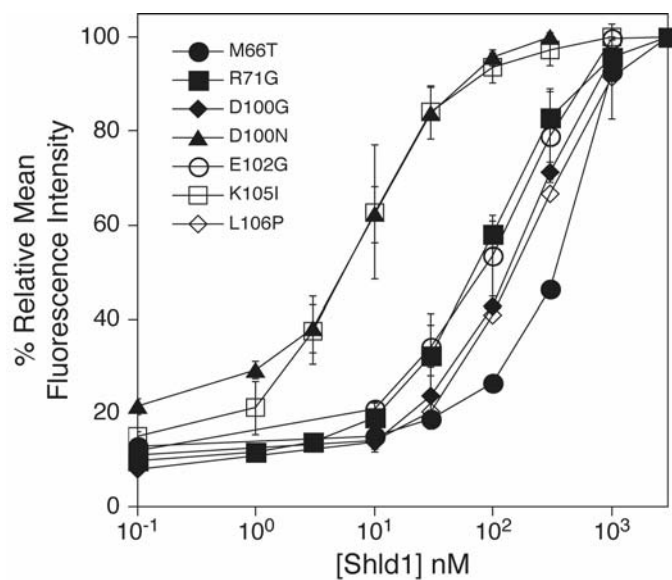

**Figure S6.** Response of YFP-FKBP fusions to varying concentrations of Shld1.

NIH3T3 cells stably expressing YFP-FKBP fusions were titrated with three-fold dilutions of Shld1 (3  $\mu$ M to 0.1 nM) and monitored by flow cytometry. Data are presented as the average mean fluorescence intensity  $\pm$  SEM relative to that of the maximum fluorescence intensity observed for the individual mutant. Experiment was performed in triplicate.

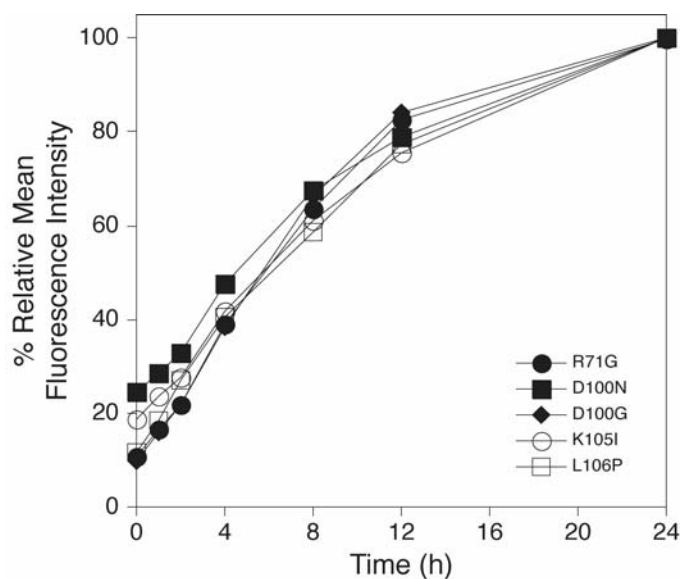

**Figure S7.** Kinetics of YFP-FKBP fluorescence growth upon addition of Shld1. NIH3T3 cells stably expressing YFP-FKBP fusions were treated with 1  $\mu$ M Shld1, and increases in fluorescence were monitored over time using flow cytometry. Data are presented as the average mean fluorescence intensity (MFI) relative to that of the maximum fluorescence intensity observed for the individual mutant. MFI was normalized to 100% at 24 hr.

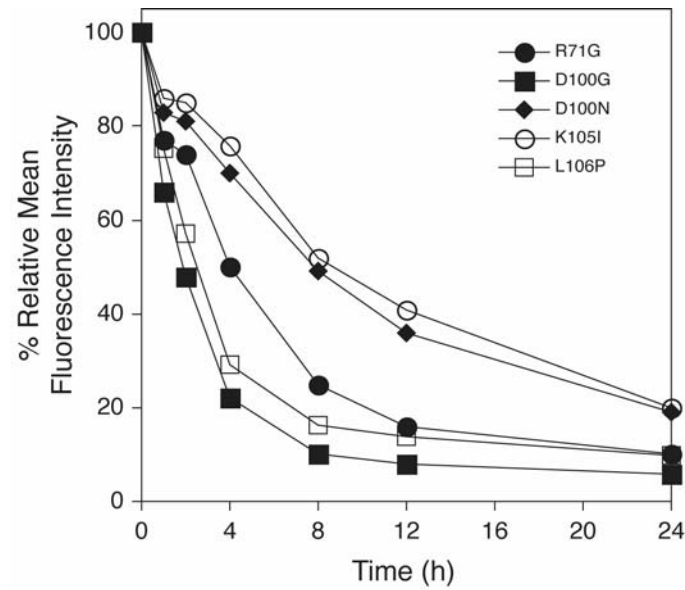

**Figure S8.** Kinetics of YFP-FKBP fluorescence decay upon removal of Shld1. NIH3T3 cells stably expressing YFP-FKBP fusions were treated with 1  $\mu$ M Shld1 for 24 hours at which point the cells were washed with media to remove Shld1, and decreases in fluorescence were monitored using flow cytometry. Data are presented as the average mean fluorescence intensity relative to that of the maximum fluorescence intensity observed for the individual mutant.

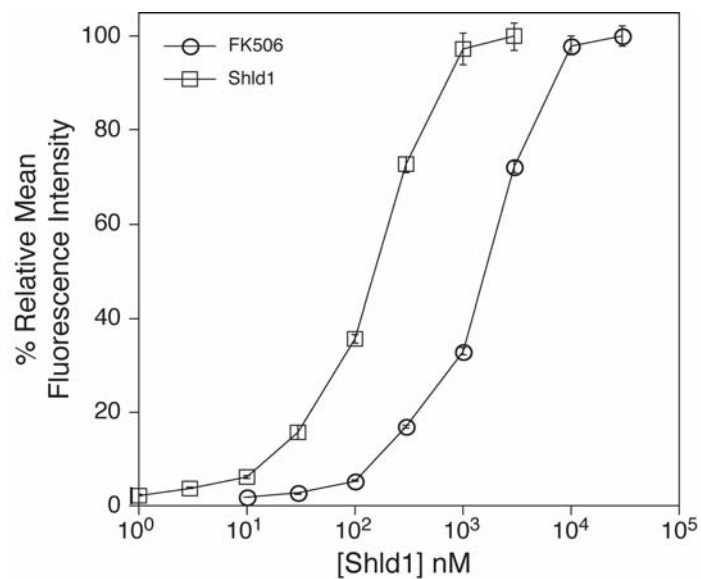

**Figure S9.** FKBP-YFP fusions are stabilized by multiple FKBP ligands. NIH3T3 cells stably expressing the L106P-YFP fusion were treated with three-fold dilutions of FK506 (30  $\mu$ M to 10 nM) or Shld1 (3  $\mu$ M to 1 nM) and monitored by flow cytometry. Data are presented as the average mean fluorescence intensity  $\pm$  SEM relative to that of the maximum fluorescence intensity observed for the L106P-YFP mutant. Experiments were performed in triplicate.

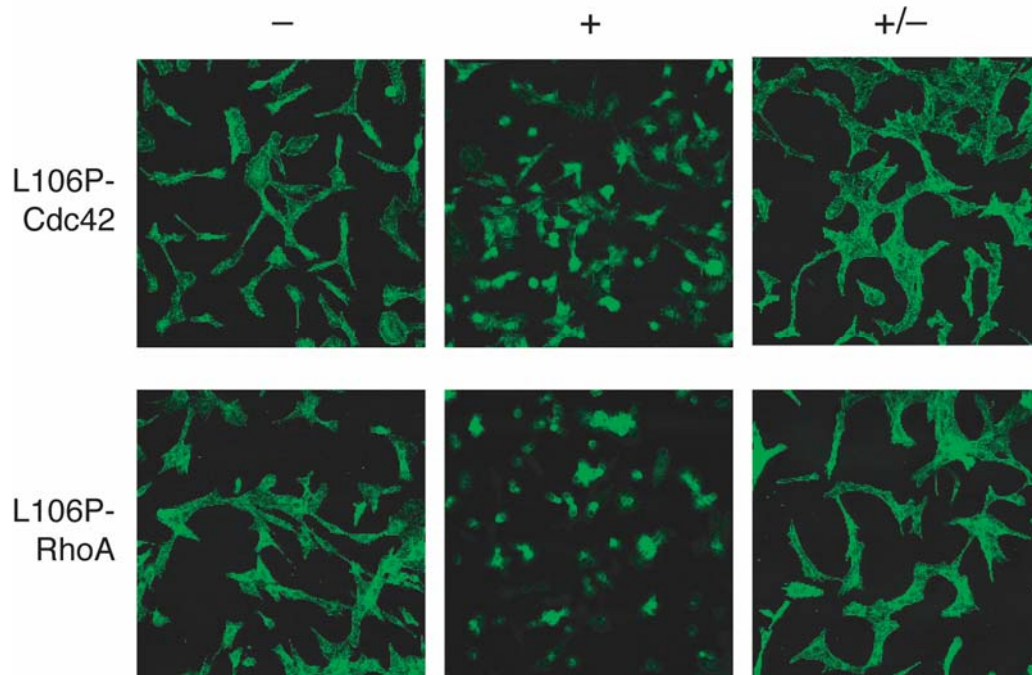

**Figure S10.** Stabilization of specific proteins with Shld1 results in predictable changes in cellular morphologies. NIH3T3 cells stably expressing fusions of a constitutively active small GTPase to the L106P destabilization domain were split into three pools. The first population (–) was mock-treated and the second population (+) was treated with 1  $\mu$ M Shld1 for 24 hrs. The third population (+/–) was treated with 1  $\mu$ M Shld1 for 24 hrs, then washed with media and cultured in the absence of Shld1 for 24 hrs (RhoA Q63L) or 48 hrs (Cdc42 Q61L). Cells were serum-starved for 12 hrs, fixed, stained with Alexa Fluor 488-conjugated phalloidin, and visualized with a 20 $\times$  objective using confocal microscopy.

## Supplemental Tables

**Table S1.** Shld1-dependent N-terminal FKBP mutants isolated from library screen.

| <u>Clone</u> | <u>No. Mutations</u> | <u>Amino Acid Changes</u>                                                                   |
|--------------|----------------------|---------------------------------------------------------------------------------------------|
| 1-37         | 0                    | None                                                                                        |
| 38           | 0                    | Stop codon introduced                                                                       |
| 39           | 0                    | Dropped base                                                                                |
| 40           | 0                    | Mixed sequence                                                                              |
| 41           | 1                    | F15S                                                                                        |
| 42           | 1                    | F15S                                                                                        |
| 43           | 1                    | V24A                                                                                        |
| 44           | 1                    | K34R                                                                                        |
| 45           | 1                    | S38P                                                                                        |
| 46           | 1                    | F46L                                                                                        |
| 47           | 1                    | V63F                                                                                        |
| 48           | 1                    | M66V                                                                                        |
| 49           | 1                    | R71S                                                                                        |
| 50           | 1                    | P78T                                                                                        |
| 51           | 1                    | D79G                                                                                        |
| 52           | 1                    | A81V                                                                                        |
| 53           | 1                    | E102G                                                                                       |
| 54           | 1                    | L106P                                                                                       |
| 55           | 2                    | F15S, N43S                                                                                  |
| 56           | 2                    | Y26H, Q53R                                                                                  |
| 57           | 2                    | G28R, E31G                                                                                  |
| 58           | 2                    | F48I, E60G                                                                                  |
| 59           | 2                    | G51D, S77P                                                                                  |
| 60           | 2                    | E54G, F99L                                                                                  |
| 61           | 2                    | Q65R, L106P                                                                                 |
| 62           | 3                    | V2A, L50A, L106A                                                                            |
| 63           | 3                    | T6A, V24A, I91A                                                                             |
| 64           | 3                    | Q3R, N43S, G69S                                                                             |
| 65           | 3                    | K44E, E60G, V63A                                                                            |
| 66           | 3                    | W59R, E60G, I76M                                                                            |
| 67           | 4                    | R13H, V24A, K35A, M49A                                                                      |
| 68           | 6                    | S8P, G28R, L30P, S39P, F99L, D100G                                                          |
| 69           | 7                    | F15S, H25R, K47G, K73R, I76V, D79G, I90V                                                    |
| 70           | 10                   | H25R, M29T, L30P, D32G, P45S, F48L, K52E, S67G, L104P, L106P                                |
| 71           | 11                   | H25R, M29T, L30P, D32G, P45S, F48L, K52E, E54G, S67G, L104P, L106P                          |
| 72           | 16                   | I7T, S8P, P9L, D11N, T14A, F15L, H25Y, L30P, D37N, D41N, A64T, I76M, G83D, T85A, I91V, F99V |

**Table S2.** Shld1-dependent C-terminal FKBP mutants isolated from library screen.

| <u>Clone</u> | <u>No. Mutations</u> | <u>Amino Acid Changes</u>                    |
|--------------|----------------------|----------------------------------------------|
| 1-5          | 0                    | None                                         |
| 6            | 0                    | Stop codon introduced                        |
| 7-8          | 0                    | Incomplete sequence                          |
| 8-12         | 0                    | Mixed sequence                               |
| 13           | 1                    | G1R                                          |
| 14           | 1                    | L30P                                         |
| 15           | 1                    | M66T                                         |
| 16           | 1                    | D100G                                        |
| 17           | 1                    | D100N                                        |
| 18           | 1                    | E102G                                        |
| 19           | 1                    | E102G                                        |
| 20           | 1                    | E107G                                        |
| 21           | 2                    | E5K, R71G                                    |
| 22           | 2                    | E5K, R71G                                    |
| 23           | 2                    | D11G, K73R                                   |
| 24           | 2                    | Q20L, T27A                                   |
| 25           | 2                    | T21A, H25R                                   |
| 26           | 2                    | C22F, M29T                                   |
| 27           | 2                    | M29T, D100G                                  |
| 28           | 2                    | E31G, E107G                                  |
| 29           | 2                    | K34Q, Q70R                                   |
| 30           | 2                    | S67G, Q70R                                   |
| 31           | 2                    | G89S, K105I                                  |
| 32           | 3                    | V4M, G33R, G58S                              |
| 33           | 3                    | D11A, D32G, K44R                             |
| 34           | 3                    | D11G, N43D, D79G                             |
| 35           | 3                    | D11G, R13C, F48L                             |
| 36           | 3                    | G19D, K35R, K105E                            |
| 37           | 3                    | E31G, R71G, K105E                            |
| 38           | 3                    | K35R, G69S, I76V                             |
| 39           | 3                    | E61G, H94R, K105R                            |
| 40           | 3                    | D79G, P93S, D100R                            |
| 41           | 3                    | D79G, P93S, D100R                            |
| 42           | 4                    | T6A, I7T, T14I, M66V                         |
| 43           | 4                    | T21A, N43D, A72V, E107G                      |
| 44           | 4                    | M29T, E31K, K52R, T75A                       |
| 45           | 4                    | R42G, K52R, D79G, E107G                      |
| 46           | 5                    | I7T, M29V, F48L, T85A, K105R                 |
| 47           | 7                    | Q3R, F15S, T21A, K44E, K73E, P88T, K105R     |
| 48           | 8                    | T6S, P9S, M29V, K34R, R42G, Q53R, K73R, D79G |

**Table S3.** Fluorescence of YFP-FKBP fusions in the absence of Shld1.

| FKBP Mutant | % Residual YFP<br>Fluorescence $\pm$ SEM* |
|-------------|-------------------------------------------|
| M66T        | $13 \pm 3.1$                              |
| R71G        | $9.8 \pm 0.6$                             |
| D100G       | $8.0 \pm 0.8$                             |
| D100N       | $22 \pm 1.5$                              |
| E102G       | $12 \pm 0.6$                              |
| K105I       | $15 \pm 4.7$                              |
| L106P       | $11 \pm 1.0$                              |

\* Data are presented as the average mean fluorescence intensity (MFI)  $\pm$  SEM relative to that of the maximum fluorescence intensity observed for the individual mutant.

Experiment was performed in triplicate.
